# Supplementary material
Source: MDPI journal article supplement (https://www.mdpi.com/2673-401X/3/4/27)
Supplement: s1 [file s1 › organics-1843259-supplementary.pdf]

## Design, Synthesis, and Photo-Responsive Properties of a Collagen Model Peptide Bearing an Azobenzene

Daisuke Sato <sup>1,2,\*</sup>, Hitomi Goto <sup>2</sup>, Yui Ishizaki <sup>2</sup>, Tetsuya Narimatsu <sup>2</sup>, and Tamaki Kato <sup>2,\*</sup>

<sup>1</sup> Graduate School of Pharmaceutical Sciences, Kyushu University, Fukuoka 812-8582, Japan

<sup>2</sup> Graduate School of Life Science and Systems Engineering, Kyushu Institute of Technology, Kitakyushu 808-0196, Japan

\* Correspondence: sato.daisuke.618@m.kyushu-u.ac.jp (D.S.); tmkato@life.kyutech.ac.jp (T.K.)

**Apparatus.** Analytical HPLC was performed on a Hitachi L-7100 instrument equipped with a Chromolith Performance RP-18e column (4.6 × 100 mm; Merck) or XTerra MS C18 column (4.6 x 150 mm; Waters). The mobile phase was a mixture of 0.1% TFA in H<sub>2</sub>O (solvent A) and 0.1% TFA in CH<sub>3</sub>CN (solvent B) with a linear gradient of solvent B in solvent A (0–100% over 15 min) and a flow rate of 2.0 mL/min (chromolith) or 1.0 mL/min (XTerra). The absorbance at 220 nm or 290 nm was used for detection. Gel permeation chromatography (GPC) was performed on a Hitachi L-7100 instrument equipped with a TSKgel GMHxL (7.8 mm x 300 mm, TOSOH). The mobile phase was DMF and a flow rate was 0.5 mL/min.

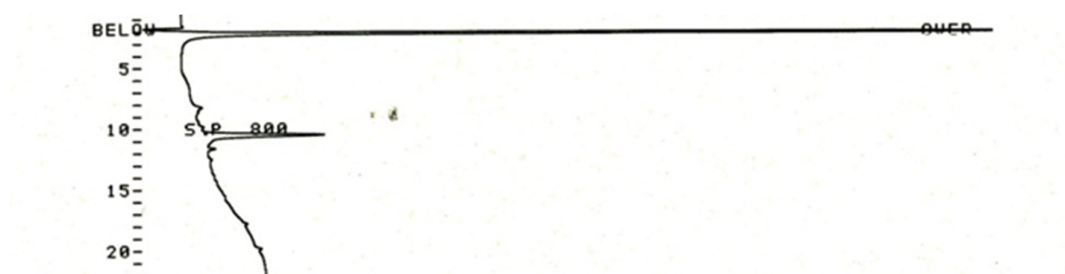

**Figure S1.** HPLC profile of Fmoc-(PPG)<sub>10</sub>-OH (**16**).

HPLC Column: XTerra MS C18 (4.6 x 150 mm)

Eluent: 10–100% B over 15 min

Solvent A: 100% H<sub>2</sub>O/0.1% TFA, Solvent B: 100% CH<sub>3</sub>CN/0.1% TFA

Wavelength: 220 nm, Flow rate: 1.0 mL/min

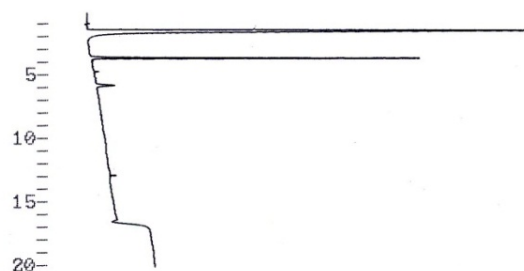

**Figure S2.** HPLC profile of Azo-Gly.

HPLC Column: Chromolith performance RP-18e (100 x 4.6 mm)

Eluent: 0–50% B over 15 min

Solvent A: 100% H<sub>2</sub>O/0.1% TFA, Solvent B: 100% CH<sub>3</sub>CN/0.1% TFA

Wavelength: 220 nm, Flow rate: 2.0 mL/min

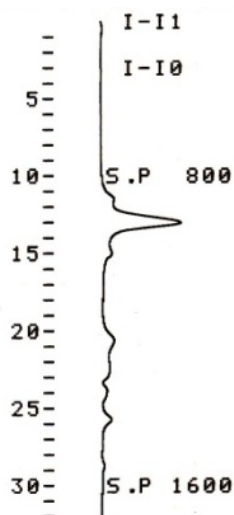

**Figure S3.** GPC profile of Azo-(PPG)<sub>10</sub>.

GPC Column: TSKgel GMHxL (7.8 mm x 300 mm)

Solvent: DMF

Wavelength: 290 nm, Flow rate: 0.5 mL/min
